# Supplementary material
Source: PubMed Central journal article supplement (PMC6207161)
Supplement: Supp_Fig1.pdf [file Supp_Fig1.pdf]

## SUPPLEMENTARY DATA

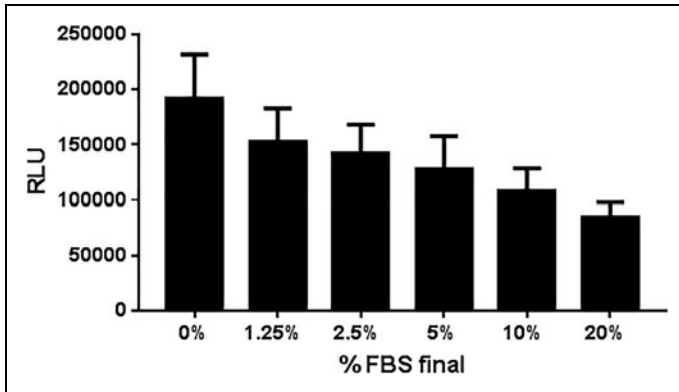

**Supplementary Fig. S1.** Effects of serum on  $\beta$ -gal reporter activity.  $\beta$ -gal, beta-galactosidase.
